# Supplementary material for: Long-term outcomes of canaloplasty and phaco-canaloplasty in the treatment of open angle glaucoma: a single-surgeon experience
Source: Springer Nature journal article supplement (doi:10.1007/s10792-024-03174-x), 2024-07-07
Supplement: MOESM1 [file 10792_2024_3174_MOESM1_ESM.pdf]

## Supplementary information (SI)

Long-term outcomes of canaloplasty and phaco-canaloplasty in the treatment of open angle glaucoma: a single-surgeon experience.

International Ophthalmology

Daniele Tognetto M.D.<sup>1</sup>, Gabriella Cirigliano M.D.<sup>1</sup>, Stefano Gouigoux M.D.<sup>1</sup>, Alberto Grotto M.D.<sup>1</sup>, Pier Luigi Guerin M.D.<sup>1</sup>, Leandro Inferrera M.D.<sup>1</sup>, Dario Marangoni M.D., Ph.D.<sup>1\*</sup>

<sup>1</sup> University Eye Clinic, Department of Medicine, Surgery and Health Sciences, University of Trieste, 34129, Trieste, Italy. \*Corresponding author.

Corresponding author:

Dario Marangoni

University Eye Clinic, Department of Medicine, Surgery and Health Sciences

University of Trieste

Piazza dell'Ospitale 1, 34129, Trieste, Italy

dario.marangoni@units.it

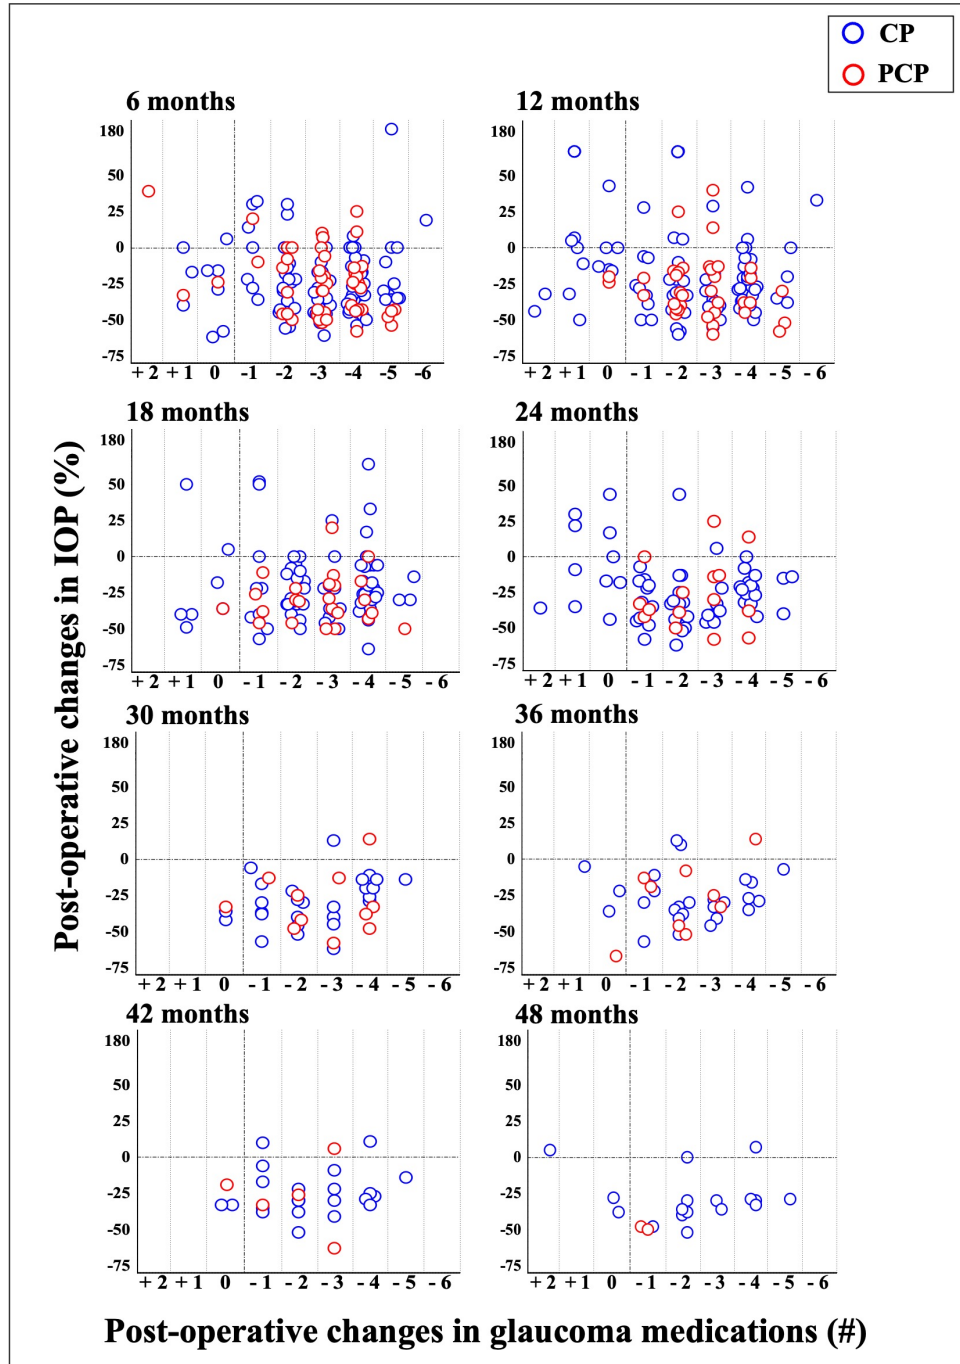

**Figure S1.**

The graphs illustrate individual changes in postoperative IOP and number of glaucoma medications after canaloplasty (blue dots) and phaco-canaloplasty (red dots) over a 48-month period, with data collected at six-month intervals. In each graph the lower right quadrant includes eyes in which both the IOP and number of glaucoma medications were reduced compared to baseline measurements. **CP** = canaloplasty, **PCP** = phaco-canaloplasty.
